# Novel Soy Germ Pasta Improves Endothelial Function, Blood Pressure, and Oxidative Stress in Patients With Type 2 Diabetes

CARLO CLERICI, MD<sup>1</sup>  
ELISABETTA NARDI, MD<sup>1</sup>  
PIER MARIA BATTEZZATI, MD<sup>2</sup>  
STEFANIA ASCIUTTI, MD<sup>1</sup>  
DANILO CASTELLANI, MD<sup>1</sup>  
NADIA CORAZZI, MD<sup>1</sup>

VITTORIO GIULIANO, MD<sup>1</sup>  
STEFANIA GIZZI, MD<sup>1</sup>  
GABRIELE PERRIELLO, MD<sup>3</sup>  
GIORGIO DI MATTEO, MD<sup>3</sup>  
FRANCESCO GALLI, MD<sup>4</sup>  
KENNETH D.R. SETCHELL, PHD<sup>5</sup>

**OBJECTIVE**—To compare the effects of a novel soy germ-enriched pasta, containing isoflavone aglycons, with conventional pasta on endothelial function and cardiovascular risk markers in patients with type 2 diabetes (T2D).

**RESEARCH DESIGN AND METHODS**—This randomized controlled double-blind crossover study compared one serving/day of soy germ pasta and conventional pasta for 8 weeks for effects on brachial artery flow-mediated vasodilation, blood pressure, plasma lipids, oxidized LDL cholesterol, 8-iso-PGF<sub>2</sub>α, total antioxidant capacity (TAC), glutathione (GSH), and homocysteine.

**RESULTS**—Isoflavone-enriched pasta significantly improved arterial stiffness ( $P = 0.005$ ) and reduced systolic ( $P = 0.026$ ) and diastolic ( $P = 0.017$ ) blood pressures. Plasma TAC increased ( $P = 0.0002$ ), oxidized LDL cholesterol decreased ( $P = 0.009$ ), 8-iso-PGF<sub>2</sub>α decreased ( $P = 0.001$ ), GSH levels increased ( $P = 0.0003$ ), and homocysteine decreased ( $P = 0.009$ ) consistent with a reduction in oxidative stress. No significant changes were observed with conventional pasta.

**CONCLUSIONS**—Pasta enriched with biologically active isoflavone aglycons improved endothelial function and had beneficial effects on cardiovascular risk markers in patients with T2D.

*Diabetes Care* 34:1946–1948, 2011

The risk of cardiovascular disease and stroke is 3–4 times greater in patients with type 2 diabetes (T2D) than in the general population (1). It results from loss of normal endothelial function and is associated with increased oxidative stress, production of reactive oxygen species (2), and a decrease in antioxidative defense systems (3). Hypertension, dyslipidemia, and hyperhomocysteinemia also

contribute to overall morbidity and mortality. In a recent study of patients with hypercholesterolemia, a soy germ-enriched pasta containing isoflavones, in mainly the biologically active aglycon form, significantly improved serum lipids and other markers of cardiovascular risk, including arterial reactivity, beyond that of an American Heart Association Step II diet alone (4). Our objective was to

determine whether similar effects from this novel food could be attained in patients with T2D.

## RESEARCH DESIGN AND METHODS

This 20-week study enrolled 26 adults with T2D (13 men/13 women, aged  $62 \pm 7$  years) in a randomized double-blind placebo-controlled crossover design. None had major complications of diabetes and all were on an American Diabetes Association diet. Prior use of estrogen therapy, oral corticosteroids, antioxidant supplements, soy foods or isoflavone supplements, a BMI  $>35$ , and smoking were exclusion criteria. The study was conducted with informed consent according to ethical guidelines for research on humans and was approved by the human ethics committee of the University of Perugia School of Medicine.

Two types of dried pasta were used: a soy germ-enriched pasta (Aliveris s.r.l., Perugia, Italy) containing 31–33 mg of total isoflavones per serving predominantly in aglycon form (Pasta+) and conventional pasta (Pasta–), with both packaged identically (4).

Patients were randomized to two groups. One group consumed one serving/day of soy germ-enriched pasta (80 g dry pasta) for 8 weeks followed by conventional pasta for 8 weeks, with a 4-week washout between. The other group consumed these pasta types in reverse sequence. Overnight fasting blood samples were collected at baseline, after washout, and at the end of the diet periods for serum/plasma biochemistries measured by standard methods. Blood pressure was measured and endothelial function assessed from changes in brachial artery flow-mediated vasodilation using ultrasound imaging of artery diameter during reactive hyperemia (5). Methods for data analysis are detailed in the Supplementary Data.

**RESULTS**—Of the 26 patients enrolled, 6 were withdrawn (4 whose drug therapies were altered, 1 who took antioxidants, and

From the <sup>1</sup>Clinic of Gastroenterology and Hepatology, University of Perugia, Perugia, Italy; the <sup>2</sup>Division of Internal Medicine VI, Department of Medicine, Surgery, and Dentistry, San Paolo School of Medicine, University of Milan, Milan, Italy; the <sup>3</sup>Department of Internal Medicine and Endocrine and Metabolic Sciences (DIMISEM), University of Perugia, Perugia, Italy; the <sup>4</sup>Institute of Biochemistry, University of Perugia, Perugia, Italy; and the <sup>5</sup>Department of Pathology and Laboratory Medicine, Cincinnati Children's Hospital Medical Center and Department of Pediatrics, University of Cincinnati College of Medicine, Cincinnati, Ohio.

Corresponding author: Kenneth D.R. Setchell, kenneth.setchell@cchmc.org.

Received 16 March 2011 and accepted 27 May 2011.

DOI: 10.2337/dc11-0495

This article contains Supplementary Data online at <http://care.diabetesjournals.org/lookup/suppl/doi:10.2337/dc11-0495/-/DC1>.

© 2011 by the American Diabetes Association. Readers may use this article as long as the work is properly cited, the use is educational and not for profit, and the work is not altered. See <http://creativecommons.org/licenses/by-nc-nd/3.0/> for details.

1 who was noncompliant to the diets). The mean BMI of the remaining subjects (10 women, 10 men) was  $28.3 \pm 3.5 \text{ kg/m}^2$ , fasting glucose was  $122 \pm 33 \text{ mg/dL}$ , and  $\text{HbA}_{1c}$  was  $6.8 \pm 0.65\%$ . After randomization, there were no significant differences between the groups (Pasta+/Pasta- vs. Pasta-/Pasta+) in these measures.

Plasma isoflavones were undetectable at baseline and when consuming Pasta-. When consuming Pasta+, serum daidzein, glycitein, and genistein concentrations ranged 12–255 nmol/L, 11–128 nmol/L, and 15–167 nmol/L, respectively, consistent with previously reported data (4).

Brachial artery flow-mediated vasodilation increased  $\sim 5\%$  after consuming Pasta+ and decreased with Pasta- (Fig. 1 and Supplementary Data); this difference was highly significant ( $P = 0.0005$ ). Consistent with improved endothelial function was a significant reduction in systolic ( $P = 0.026$ ) and diastolic ( $P = 0.017$ ) blood pressures. Pasta+ lowered systolic blood pressure from  $133 \pm 1$  at baseline to  $126 \pm 12 \text{ mmHg}$ , and diastolic blood pressure from  $79 \pm 9$  at baseline to  $73 \pm 10 \text{ mmHg}$ . Pasta- had no effect on blood pressure.

The effect of the two pastas on serum total cholesterol was in the opposite direction, with the difference being significant ( $P = 0.025$ ). Favorable, albeit not significant, differential trends were observed with Pasta+ on serum LDL cholesterol, HDL cholesterol, and triglyceride levels.

Several markers of oxidative stress improved after consuming Pasta+ (Fig. 1 and Supplementary Data). Plasma total antioxidant capacity (TAC) increased significantly ( $P = 0.0002$ ) in comparison with Pasta-. Plasma 8-iso-PGF $2\alpha$  concentration was reduced ( $P = 0.001$ ) and glutathione (GSH) increased ( $P = 0.0003$ ). Consistent with these changes was a reduction in lipid peroxidation, as observed by a decrease in plasma oxidized LDL cholesterol ( $P = 0.009$ ). Serum homocysteine concentration was lower ( $P = 0.017$ ) after Pasta+ compared with Pasta-, but there was no effect of either pasta on serum cysteine or interleukin-6 levels. At baseline, all patients were in good glycemic control and, consequently, neither pasta influenced plasma insulin, glucose, or  $\text{HbA}_{1c}$  levels.

**CONCLUSIONS**—This novel soy germ pasta was developed with the objective of delivering biologically active isoflavone aglycons (4) at levels typically

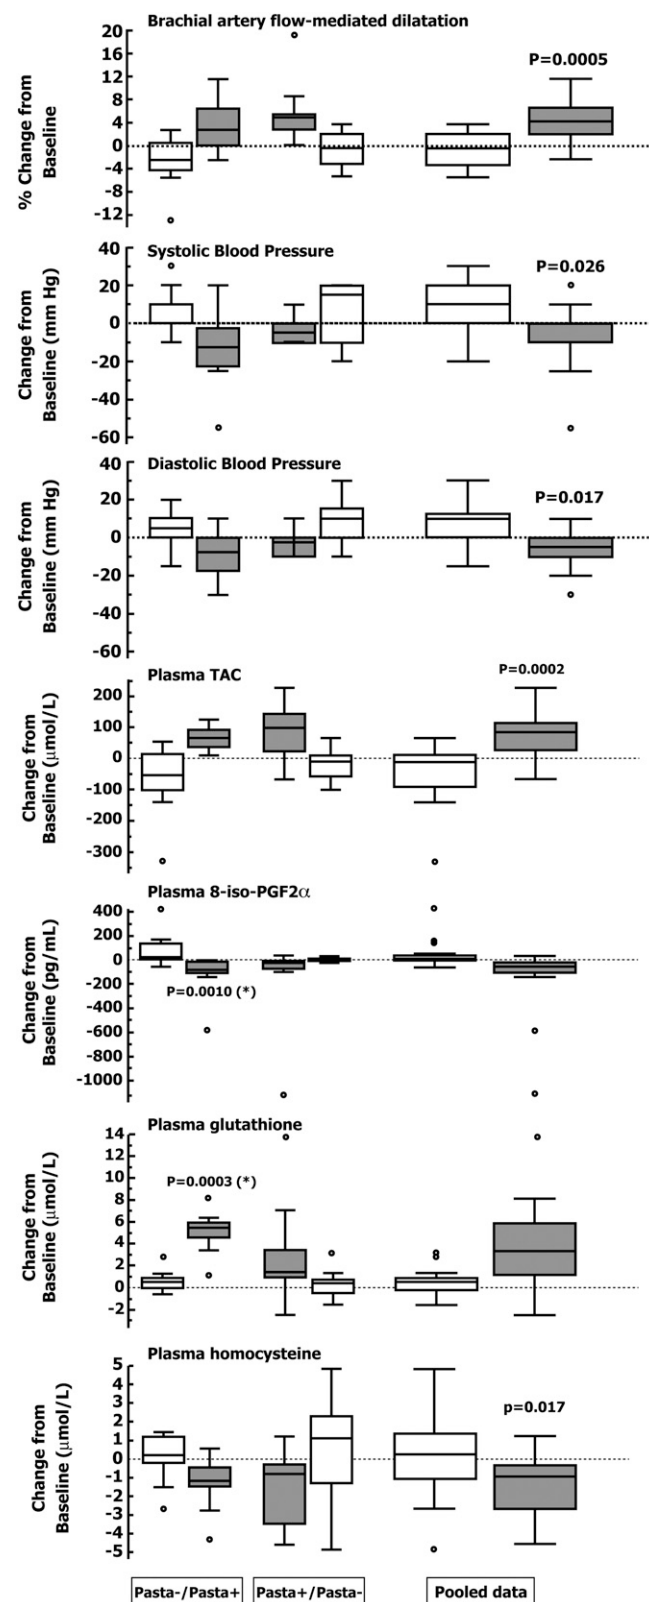

**Figure 1**—Box plots showing changes from baseline in brachial artery flow-mediated dilatation, systolic and diastolic blood pressures, TAC in plasma, plasma 8-iso-PGF $2\alpha$  concentrations, plasma GSH concentration, and serum homocysteine concentration measured in adult T2D patients ( $n = 20$ ) at baseline and after consuming pasta enriched with isoflavones from soy germ (Pasta+, gray-shaded box and circles) or conventional pasta (Pasta-, control, white box and circles) for 8 weeks. Effects are also shown separately during each sequence of administration of the two pasta types (Pasta-/Pasta+,  $n = 11$ , and Pasta+/Pasta-,  $n = 9$ ). The line in the middle of

found in soy foods in the Asian diet (6) and not to satisfy the 1999-approved U.S. Food and Drug Administration cardiovascular health claim for soy protein (7). A high dietary intake of isoflavone aglycons may explain why soy foods appear beneficial to Asians (8) and why pure aglycon supplements, such as genistein (9) or S-(-)equol (10), are proving efficacious. Because Italians consume pasta almost daily, this facilitated dietary compliance, which was confirmed by the expected increase in plasma isoflavone concentrations (4) or from returned package counts.

Although no significant changes were observed with either pasta on serum total and LDL cholesterol, which were relatively normal at baseline, serum triglycerides showed a decreasing trend that was greater with Pasta+ than Pasta-. Despite a lack of effect on serum lipids, impressive effects on other important surrogate markers of cardiovascular risk were observed. Endothelial dysfunction, an early marker of cardiovascular disease, has prognostic value in assessing cardiovascular risk (11) and was significantly improved by Pasta+. This finding corroborates previous data in hypercholesterolemic patients (4) and is consistent with the vasodilatory effects of isoflavone aglycons (9). With Pasta+, highly significant 8 and 7% reductions, respectively, in systolic and diastolic blood pressures occurred, and considering the small sample-size, the magnitude of the effect on endothelial function and blood pressure is impressive and clinically relevant.

Because isoflavones have antioxidant activity (12), the finding of highly significant beneficial effects of Pasta+ on several markers of oxidative stress, and on serum GSH, a key constituent of the antioxidant defense system, was not unexpected but important given that increased oxidative stress is seen in T2D (13). Furthermore, hyperhomocysteinemia is an independent risk factor for cardiovascular disease in diabetes (14), and Pasta+ lowered

serum levels of this atherogenic and prothrombotic amino acid.

In summary, this isoflavone-enriched soy germ pasta, unlike conventional pasta, significantly improved multiple markers of cardiovascular risk in patients with T2D. Dietary inclusion of this novel pasta may provide benefits to diabetic patients beyond those achieved by an American Diabetes Association diet alone.

**Acknowledgments**—The authors acknowledge the support of the Aliveris s.r.l. Company (Perugia, Italy) and the Bianconi Company (Bastardo, Umbria, Italy) for providing the soy germ pasta and conventional pasta used in this study. C.C. and K.D.R.S. disclose financial interests in Aliveris s.r.l. No other potential conflicts of interest relevant to this article were reported.

C.C. and K.D.R.S. were principal investigators responsible for the conception and design of the study and prepared the manuscript with support from the coauthors. E.N. was responsible for recruitment, enrollment, clinical care, and follow-up of patients and performed the clinical and biochemical tests, data collection, and processing. P.M.B. performed all the statistical analysis of data. S.A., D.C., and F.G. performed the clinical and biochemical tests, data collection, and processing. N.C. was responsible for recruitment, enrollment, clinical care, and follow-up of patients. V.G. and S.G. performed the clinical and biochemical tests, data collection, and processing. G.P. and G.D.M. were responsible for recruitment, enrollment, clinical care, and follow-up of patients.

#### References

1. Beckman JA, Creager MA, Libby P. Diabetes and atherosclerosis: epidemiology, pathophysiology, and management. *JAMA* 2002;287:2570–2581
2. Guerci B, Böhme P, Kearney-Schwartz A, Zannad F, Drouin P. Endothelial dysfunction and type 2 diabetes. Part 2: altered endothelial function and the effects of treatments in type 2 diabetes mellitus. *Diabetes Metab* 2001;27:436–447
3. Hill MF. Emerging role for antioxidant therapy in protection against diabetic cardiac

complications: experimental and clinical evidence for utilization of classic and new antioxidants. *Curr Cardiol Rev* 2008;4:259–268

4. Clerici C, Setchell KDR, Battezzati PM, et al. Pasta naturally enriched with isoflavone aglycons from soy germ reduces serum lipids and improves markers of cardiovascular risk. *J Nutr* 2007;137:2270–2278
5. Celermajer DS, Sorensen KE, Gooch VM, et al. Non-invasive detection of endothelial dysfunction in children and adults at risk of atherosclerosis. *Lancet* 1992;340:1111–1115
6. Messina M, Nagata C, Wu AH. Estimated Asian adult soy protein and isoflavone intakes. *Nutr Cancer* 2006;55:1–12
7. Food and Drug Administration. Food labeling, health claims, soy protein, and coronary heart disease. *Fed Regist* 1999;57:699–733
8. Setchell KDR, Clerici C. Equol: history, chemistry, and formation. *J Nutr* 2010;140:1355S–1362S
9. Squadrito F, Altavilla D, Crisafulli A, et al. Effect of genistein on endothelial function in postmenopausal women: a randomized, double-blind, controlled study. *Am J Med* 2003;114:470–476
10. Ishiwata N, Melby MK, Mizuno S, Watanabe S. New equol supplement for relieving menopausal symptoms: randomized, placebo-controlled trial of Japanese women. *Menopause* 2009;16:141–148
11. Vita JA, Keaney JF Jr. Endothelial function: a barometer for cardiovascular risk? *Circulation* 2002;106:640–642
12. Ruiz-Larrea MB, Mohan AR, Paganga G, Miller NJ, Bolwell GP, Rice-Evans CA. Antioxidant activity of phytoestrogenic isoflavones. *Free Radic Res* 1997;26:63–70
13. Gopaul NK, Anggård EE, Mallet AI, Betteridge DJ, Wolff SP, Nourooz-Zadeh J. Plasma 8-epi-PGF2 alpha levels are elevated in individuals with non-insulin dependent diabetes mellitus. *FEBS Lett* 1995;368:225–229
14. Hermansen K, Søndergaard M, Hoie L, Carstensen M, Brock B. Beneficial effects of a soy-based dietary supplement on lipid levels and cardiovascular risk markers in type 2 diabetic subjects. *Diabetes Care* 2001;24:228–233

*the box represents the median or 50th percentile of the data, and the box extends from the 25th to the 75th percentile, an interval referred to as the interquartile range. The lines emerging from the box extend to the upper and lower adjacent values (i.e., the largest data point less than or equal to the 75th percentile plus 1.5 times the interquartile range, and the smallest data point greater than or equal to the 25th percentile minus 1.5 times the interquartile range, respectively). If the examined data come from a normal distribution, one would expect the interval between the adjacent values to include 99.3% of the data. Observed points more extreme than the upper or lower adjacent values, if any, are plotted individually. Significance levels (P < 0.20) for the comparison of the effects of the two pasta types are reported.*
